# Supplementary material
Source: PubMed Central journal article supplement (PMC8118571)
Supplement: NIHMS1001884-supplement-1.pdf [file NIHMS1001884-supplement-1.pdf]

# Supplemental Appendix

## Semiparametric inference under a discrete choice model for nonmonotone missing not at random data

Eric J. Tchetgen Tchetgen, Linbo Wang, BaoLuo Sun

Department of Biostatistics,  
Harvard University

### 1 Sensitivity analysis for CCMV

Identification conditions such as CCMV are not generally empirically testable and therefore, it is important that inferences in a given analysis are assessed for sensitivity to violation of such assumptions. Specifically, a violation of the CCMV assumption can occur if for some  $r$ ,

$$R \not\perp L_{(-r)} | L_{(r)}, R \in \{1, r\},$$

which can be encoded by specifying the degree of departure from the identifying assumption, on the odds ratio scale using the selection bias function:

$$\theta_r(L_{(-r)}, L_{(r)}) = \frac{\pi_r(L_{(r)}, L_{(-r)}) \pi_1(L_{(r)}, L_{(-r)} = 0)}{\pi_1(L_{(r)}, L_{(-r)}) \pi_r(L_{(r)}, L_{(-r)} = 0)}.$$

CCMV corresponds to the null  $\theta_r(L_{(-r)}, L_{(r)}) = 1$  for all  $r$ , and  $\theta_r(L_{(-r)}, L_{(r)}) \neq 1$  for some  $r$  indicates violation of the assumption. The function  $\theta_r(\cdot, \cdot)$  is not nonparametrically identified from the observed data. Therefore we propose that one may specify a functional form for  $\theta_r(\cdot, \cdot)$  for use in a sensitivity analysis in the spirit of Robins et al (1999). Hereafter, suppose that one has specified functions  $\theta = \{\theta_r : r\}$ . For such specification, we describe IPW, PM and DR estimation incorporating a non-null  $\theta_r$ .

For IPW estimation, we propose to modify  $W_r$  of Section 5 as follows. Let  $W_r(G_r; \alpha, \theta_r) = G_r \times [1 \{R = r\} - 1 \{R = 1\} \theta_r(L) \Pi_r(\alpha) / \Pi_1(\alpha)]$ , and denote by  $\hat{\alpha}(\theta)$  the solution to  $\mathbb{P}_n W_r(G_r; \hat{\alpha}(\theta), \theta_r) = 0$ , then a consistent IPW estimator  $\hat{\beta}_{ipw}(\theta)$  solves equation (10) in the main text with  $\Pi_1$  replaced

by  $\Pi_1^*(\hat{\alpha}(\theta)) = \left\{ 1 + \sum_{r \neq 1} \theta_r(L) \Pi_r(\hat{\alpha}(\theta)) / \Pi_1(\hat{\alpha}(\theta)) \right\}^{-1}$

Likewise, PM estimation hinges on the following expression

$$\begin{aligned} & E \{ U(L; \beta) | R = r, L_{(r)}; \tilde{\eta}, \theta \} \\ &= \frac{\int \theta_r(L_{(-r)}, L_{(r)}) U(l_{(-r)}, L_{(r)}; \beta) f(l_{(-r)}, L_{(r)} | R = 1; \eta) d\mu(l_{(-r)})}{\int \theta_r(L_{(-r)}, L_{(r)}) f(l_{(-r)}, L_{(r)} | R = 1; \eta) d\mu(l_{(-r)})} \end{aligned}$$

which may be used in place of  $E \{ U(L; \beta) | R = 1, L_{(r)}; \tilde{\eta} \}$  in equation (12), which in turn may be used to obtain the PM estimator  $\hat{\beta}_{pm}(\theta)$ . Finally, for a given value of  $\theta$ , the DR estimator  $\hat{\beta}_{dr}(\theta)$  solves equation (14) with  $V(\hat{\beta}_{dr}, \tilde{\alpha}, \tilde{\eta})$  replaced by

$$\begin{aligned} V(\beta, \hat{\alpha}(\theta), \tilde{\eta}; \theta) &= \left\{ \frac{1(R=1)}{\Pi_1^*(\hat{\alpha}(\theta))} U(L; \beta) \right\} \\ &\quad - \frac{1(R=1)}{\Pi_1^*(\hat{\alpha}(\theta))} \sum_{r \neq 1} \Pi_r^*(\hat{\alpha}(\theta)) E[U(L; \beta) | L_{(r)}, R = r; \tilde{\eta}, \theta] \\ &\quad + \sum_{r \neq 1} I(R=r) E[U(L; \beta) | L_{(r)}, R = r; \tilde{\eta}, \theta], \end{aligned}$$

where

$$\Pi_r^*(\hat{\alpha}(\theta)) = \frac{\theta_r(L) \Pi_r(\hat{\alpha}(\theta)) / \Pi_1(\hat{\alpha}(\theta))}{\left\{ 1 + \sum_{r' \neq 1} \theta_{r'}(L) \Pi_{r'}(\hat{\alpha}(\theta)) / \Pi_1(\hat{\alpha}(\theta)) \right\}},$$

A sensitivity analysis then entails reporting  $\hat{\beta}_{ipw}(\theta)$ ,  $\hat{\beta}_{pm}(\theta)$  or  $\hat{\beta}_{dr}(\theta)$  for a range of values of  $\theta$ .

## 2 Proof of Lemmas

**Proof of Lemma 1:** The result follows from the following generalized odds ratio representation of the joint likelihood of  $f(R, L)$  (see Chen, 2007 and Tchetgen Tchetgen et al, 2010)

$$f(R, L) = \frac{f(R|L=0) f(L|R=1) \text{OR}(R, L)}{\iint f(r^*|L=0) f(l^*|R=1) \text{OR}(r^*, l^*) d\mu(r^*, l^*)},$$

provided that  $\iint f(r^*|L=0) f(l^*|R=1) \text{OR}(r^*, l^*) d\mu(r^*, l^*) < \infty$ , where the generalized odds ratio function  $\text{OR}(R, L)$  is defined as

$$\text{OR}(R, L) = \frac{f(R, L) f(R=1, L=0)}{f(R=1, L) f(R, L=0)}.$$

Then

$$\begin{aligned} & \frac{f(R|L=0) f(L|R=1) \text{OR}(R, L)}{\iint f(r^*|L=0) f(l^*|R=1) \text{OR}(r^*, l^*) d\mu(r^*, l^*)} \\ &= \frac{\frac{f(R|L=0)}{f(R=1|L=0)} \text{OR}(R, L) f(L|R=1)}{\iint \frac{f(r^*|L=0)}{f(R=1|L=0)} \text{OR}(r^*, l^*) f(l^*|R=1) d\mu(r^*, l^*)} \\ &= \frac{\prod_{r \neq 1} \text{Odds}_r(L)^{I(R=r)} f(L|R=1) f(L|R=1)}{\iint \prod_{r \neq 1} \text{Odds}_r(l^*)^{I(r^*=r)} f(l^*|R=1) d\mu(r^*, l^*)} \end{aligned}$$

proving the result.

**Proof of Lemma 2:** The complete-case joint distribution  $f(L|R=1)$  is nonparametrically just-identified under assumption (1). Furthermore, pairwise MAR implies that  $\text{Odds}_r(L) = \text{Odds}_r(L_{(r)})$  is nonparametrically just-identified from data  $\{(R, L_{(R)}) : R \in \{1, r\}\}$ , because  $L_{(-r)}$  is MAR conditional on  $L_{(R)}$  and  $R \in \{1, r\}$ . Specifically,

$$\begin{aligned} & \Pr\{R=r|L, R \in \{1, r\}\} \\ &= \frac{\Pr\{R=r, L\}}{\Pr\{L, R \in \{1, r\}\}} \\ &= \frac{\text{Odds}_r(L_{(r)}) f(L|R=1) f(L|R=1)}{\text{Odds}_r(L_{(r)}) f(L|R=1) f(L|R=1) + f(L|R=1) f(L|R=1)} \\ &= \frac{\text{Odds}_r(L_{(r)})}{\text{Odds}_r(L_{(r)}) + 1}, \end{aligned}$$

proving the result.

**Proof of Theorem 3:** The result essentially follows from the following DR property of  $V(\beta, \alpha, \eta)$ .

Let  $V(\beta, \alpha^*, \eta_0)$  denote the estimating function evaluated at the incorrect  $\Pi_r$  and true  $E[U(L; \beta)|L_{(r)}, R =$

1] for all  $r$ . Likewise let  $V(\beta, \alpha_0, \eta^*)$  for the opposite setting. DR property holds if  $E\{V(\beta_0, \alpha^*, \eta_0)\} = E\{V(\beta_0, \alpha_0, \eta^*)\} = 0$ . First, note that under  $\mathcal{M}_R$ ,  $\tilde{\alpha} \rightarrow \alpha_0$  and  $\tilde{\eta} \rightarrow \eta^*$  in probability, then  $\mathbb{P}_n V(\beta_0, \tilde{\alpha}, \tilde{\eta}) \rightarrow E\{V(\beta_0, \alpha_0, \eta^*)\}$  in probability by Continuous Mapping Theorem and the Law of Large Numbers. We also have that

$$\begin{aligned}
E(V(\beta, \alpha_0, \eta^*)) &= E\left\{\frac{1(R=1)}{\Pi_1(\alpha_0)}U(L; \beta_0)\right. \\
&\quad \left.- \sum_{r \neq 1} \left(\frac{1(R=1)\Pi_r(\alpha_0)}{\Pi_1(\alpha)} - 1(R=r)\right) E[U(L; \beta)|L_{(r)}, R=1; \eta^*]\right\} \\
&= E\left\{\frac{E\{1(R=1)|L\}}{\Pi_1(\alpha_0)}U(L; \beta_0)\right. \\
&\quad \left.- \sum_{r \neq 1} \underbrace{\left(\frac{E\{1(R=1)|L\}\Pi_r(\alpha_0)}{\Pi_1(\alpha)} - E\{1(R=r)|L\}\right)}_{=0} E[U(L; \beta)|L_{(r)}, R=1; \eta^*]\right\} \\
&= E[U(L; \beta_0)] = 0
\end{aligned}$$

By the same token, under  $\mathcal{M}_L$ ,  $\tilde{\alpha} \rightarrow \alpha^*$  and  $\tilde{\eta} \rightarrow \eta_0$  in probability, then  $\mathbb{P}_n V(\beta_0, \tilde{\alpha}, \tilde{\eta}) \rightarrow E\{V(\beta_0, \alpha^*, \eta_0)\}$ . Next we show that  $E\{V(\beta_0, \alpha^*, \eta_0)\} = 0$ . Note that for all  $\alpha$

$$\begin{aligned}
\frac{1}{\Pi_1(\alpha)} &= 1 + \sum_{r \neq 1} \frac{\Pi_r(\alpha)}{\Pi_1(\alpha)} \\
&= 1 + \sum_{r \neq 1} \text{Odds}_r(L_{(r)}; \alpha).
\end{aligned}$$

Then we have that

$$\begin{aligned}
E(V(\beta, \alpha_0, \eta^*)) &= E \left\{ \frac{1(R=1)}{\Pi_1(\alpha^*)} \left\{ U(L; \beta_0) - \sum_{r \neq 1} \Pi_r(\alpha^*) E[U(L; \beta) | L_{(r)}, R=1; \eta_0] \right\} \right. \\
&\quad \left. + \sum_{r \neq 1} 1(R=r) E[U(L; \beta) | L_{(r)}, R=1; \eta_0] \right\} \\
&= E \left\{ 1(R=1) \left\{ \frac{U(L; \beta_0)}{\Pi_1(\alpha^*)} - \sum_{r \neq 1} \frac{\Pi_r(\alpha^*)}{\Pi_1(\alpha^*)} E[U(L; \beta) | L_{(r)}, R=1; \eta_0] \right\} \right. \\
&\quad \left. + \sum_{r \neq 1} 1(R=r) E[U(L; \beta) | L_{(r)}, R=1; \eta_0] \right\} \\
&= E \left\{ \underbrace{\sum_{r \neq 1} \text{Odds}_r(L_{(r)}; \alpha^*) (E[U(L; \beta_0) | R=1, L_{(r)}] - E[U(L; \beta) | L_{(r)}, R=1; \eta_0])}_{=0} \right\} \\
&\quad \left. + 1(R=1) U(L; \beta_0) + \sum_{r \neq 1} 1(R=r) E[U(L; \beta) | L_{(r)}, R=1; \eta_0] \right\} \\
&= E \left\{ 1(R=1) U(L; \beta_0) + \sum_{r \neq 1} 1(R=r) E[U(L; \beta) | L_{(r)}, R=1; \eta_0] \right\} \\
&= E \left\{ 1(R=1) U(L; \beta_0) + \sum_{r \neq 1} 1(R=r) E[U(L; \beta) | L_{(r)}, R=r] \right\} \\
&= E \left\{ 1(R=1) E[U(L; \beta_0) | R=1] + \sum_{r \neq 1} 1(R=r) E[U(L; \beta) | R=r] \right\} \\
&= E[U(L; \beta_0)] = 0
\end{aligned}$$

proving the result.

**Proof of Corollary 4:**  $E(V(\beta, \alpha, \eta))$  can be written

$$\begin{aligned}
& E(V(\beta, \alpha, \eta)) \\
&= E \left\{ \sum_{r \neq 1} \frac{1(R=1) \Pi_r(\alpha)}{\Pi_1(\alpha)} U(L; \beta_0) - \sum_{r \neq 1} \frac{1(R=1) \Pi_r(\alpha)}{\Pi_1(\alpha)} E[U(L; \beta) | L_{(r)}, R=1; \eta] \right. \\
&\quad \left. + \sum_{r \neq 1} 1(R=r) E[U(L; \beta) | L_{(r)}, R=1; \eta] + 1(R=1) U(L; \beta_0) \right\} \\
&= E \left\{ \sum_{r \neq 1} \frac{1(R=1) \Pi_r(\alpha)}{\Pi_1(\alpha)} U(L; \beta_0) - \sum_{r \neq 1} \frac{1(R=1) \Pi_r(\alpha)}{\Pi_1(\alpha)} E[U(L; \beta) | L_{(r)}, R=1; \eta] \right. \\
&\quad \left. + \sum_{r \neq 1} 1(R=r) \{E[U(L; \beta) | L_{(r)}, R=1; \eta] - U(L; \beta_0)\} + U(L; \beta_0) \right\} \\
&= E \left[ \sum_{r \neq 1} \{1(R=1) \text{Odds}_r(L_{(r)}; \alpha) - 1(R=r)\} \{U(L; \beta_0) - E[U(L; \beta) | L_{(r)}, R=1; \eta]\} \right]
\end{aligned}$$

Under  $\mathcal{M}_R(r)$ , we have that  $\text{Odds}_r(L_{(r)}; \tilde{\alpha}) \rightarrow \text{Odds}_r(L_{(r)}; \alpha_0)$  in probability, and

$$\begin{aligned}
& E \left[ \{1(R=1) \text{Odds}_r(L_{(r)}; \alpha_0) - 1(R=r)\} \{U(L; \beta_0) - E[U(L; \beta) | L_{(r)}, R=1; \eta^*]\} \right] \\
&= E \left[ \left\{ 1(R=1) \frac{\Pi_r}{\Pi_1} - 1(R=r) \right\} \{U(L; \beta_0) - E[U(L; \beta) | L_{(r)}, R=1; \eta^*]\} \right] \\
&= E \left[ \{\Pi_r - E[1(R=r) | L]\} \{U(L; \beta_0) - E[U(L; \beta) | L_{(r)}, R=1; \eta^*]\} \right] \\
&= 0
\end{aligned}$$

Likewise, under  $\mathcal{M}_L(r)$ , we have that  $E[U(L; \beta) | L_{(r)}, R=1; \tilde{\eta}] \rightarrow E[U(L; \beta) | L_{(r)}, R=1; \eta_0]$  in probability, and

$$\begin{aligned}
& E \left[ \{1(R = 1) \text{Odds}_r(L_{(r)}; \alpha^*) - 1(R = r)\} \{U(L; \beta_0) - E[U(L; \beta)|L_{(r)}, R = 1; \eta_0]\} \right] \\
&= E \left[ 1(R = 1) \text{Odds}_r(L_{(r)}; \alpha^*) \{E\{U(L; \beta_0)|R = 1, L_{(r)}\} - E[U(L; \beta)|L_{(r)}, R = 1; \eta_0]\} \right] \\
&\quad - E \left[ \{1(R = r)\} \{E\{U(L; \beta_0)|R = r, L_{(r)}\} - E[U(L; \beta)|L_{(r)}, R = 1; \eta_0]\} \right] \\
&= -E \left[ \{1(R = r)\} \{E\{U(L; \beta_0)|R = 1, L_{(r)}\} - E[U(L; \beta)|L_{(r)}, R = 1; \eta_0]\} \right] \\
&= 0
\end{aligned}$$

proving the result.

Table S1: Monte Carlo results of the IPW, PM and DR estimators: bias, standard error and root mean squared error. The true value of  $\beta$  is 0.634, and the sample size is 2000.

|          | <b>bth*</b>   | <b>nrm</b>    | <b>ccm</b>    | <b>bad</b>    |
|----------|---------------|---------------|---------------|---------------|
| Bias(SE) |               |               |               |               |
| IPW      | -0.004(0.002) | -0.004(0.002) | -0.641(0.012) | -0.641(0.012) |
| PM       | -0.002(0.001) | -0.367(0.002) | -0.002(0.001) | -0.367(0.002) |
| DR       | -0.002(0.002) | -0.006(0.002) | -0.002(0.002) | -0.371(0.003) |
| RMSE     |               |               |               |               |
| IPW      | 0.072         | 0.072         | 0.748         | 0.748         |
| PM       | 0.046         | 0.373         | 0.046         | 0.373         |
| DR       | 0.048         | 0.057         | 0.057         | 0.385         |

\*: **bth**: both models correct; **nrm**: nonresponse model correct; **ccm**: complete-case model correct; **bad**: both models incorrect.

### 3 Additional Simulation Results

Table S1 shows Monte Carlo results comparing the proposed large sample estimator of standard deviation (and corresponding coverage probabilities of Wald 95% confidence intervals) of IPW, PM and DR estimators of  $\beta$  to corresponding Monte Carlo standard deviations .



## References

- [1] Chen, H. Y. A semiparametric odds ratio model for measuring association. *Biometrics* 63.2 (2007): 413-421.
- [2] Robins JM, Rotnitzky A, Scharfstein D. (1999). Sensitivity Analysis for Selection Bias and Unmeasured Confounding in Missing Data and Causal Inference Models. In: *Statistical Models in Epidemiology: The Environment and Clinical Trials*. Halloran, M.E. and Berry, D., eds. IMA Volume 116, NY: Springer-Verlag, pp. 1-92.
- [3] Tchetgen Tchetgen, E. J., Robins, J. M., & Rotnitzky, A. (2010). On doubly robust estimation in a semiparametric odds ratio model. *Biometrika*, 97(1), 171-180.
